# Supplementary material
Source: publisher site journal article supplement (https://www.dovepress.com/article/327739)
Supplement: Supplementary file 1 [file get_supplementary_file.php]

Supplementary table 1A. Comparison of the knowledge of medical, pharmacy, and nurse students for each knowledge question based on their age, gender and hearing of the term ADR at the University of Gondar College of Medicine and Health sciences

| KQ | Choice | The frequency (%) of students by age |            | P-value | The frequency (%) of students by gender |           | P-value | The frequency (%) of students hearing of the term ADR |          | P-value |
|----|--------|--------------------------------------|------------|---------|-----------------------------------------|-----------|---------|-------------------------------------------------------|----------|---------|
|    |        | < 23                                 | ≥ 23       |         | Male                                    | Female    |         | Yes                                                   | No       |         |
| 1  |        |                                      |            | 0.005   |                                         |           | 0.005   |                                                       |          | 0.084   |
|    | A+     | 38 (12.8)                            | 112 (37.8) |         | 108 (36.5)                              | 42 (14.2) |         | 122 (41.2)                                            | 28 (9.5) |         |
|    | B      | 29 (9.8)                             | 48 (16.2)  |         | 53 (17.9)                               | 24 (8.1)  |         | 59 (19.9)                                             | 18 (6.1) |         |
|    | C      | 27 (9.1)                             | 29 (19.8)  |         | 27 (9.1)                                | 29 (9.8)  |         | 47 (15.9)                                             | 9 (3.0)  |         |
|    | D      | 7 (2.4)                              | 6 (2.0)    |         | 6 (2.0)                                 | 7 (2.4)   |         | 7 (2.4)                                               | 6 (2.0)  |         |
| 2  |        |                                      |            | 0.008*  |                                         |           | 0.014*  |                                                       |          | 0.451   |
|    | A      | 37 (12.5)                            | 55 (18.6)  |         | 62 (20.9)                               | 30 (10.1) |         | 69 (23.3)                                             | 23 (7.8) |         |
|    | B      | 19 (6.4)                             | 36 (12.2)  |         | 32 (10.8)                               | 23 (7.8)  |         | 44 (14.9)                                             | 11 (3.7) |         |
|    | C      | 21 (7.1)                             | 22 (7.4)   |         | 21 (7.1)                                | 22 (7.4)  |         | 33 (11.1)                                             | 10 (3.4) |         |

|   |                |           |            |        |            |           |        |            |           |       |
|---|----------------|-----------|------------|--------|------------|-----------|--------|------------|-----------|-------|
|   | D <sup>+</sup> | 24 (8.1)  | 82 (27.7)  |        | 79 (26.7)  | 27 (9.1)  |        | 89 (30.1)  | 17 (5.7)  |       |
| 3 |                |           |            | 0.171  |            |           | 0.168  |            |           | 0.834 |
|   | A              | 11 (3.7)  | 24 (8.1)   |        | 25 (8.4)   | 10 (3.4)  |        | 28 (9.5)   | 7 (2.4)   |       |
|   | B              | 9 (3.0)   | 17 (5.7)   |        | 17 (5.7)   | 9 (3.0)   |        | 19 (6.4)   | 7 (2.4)   |       |
|   | C              | 14 (4.7)  | 12 (4.1)   |        | 12 (4.1)   | 14 (4.7)  |        | 20 (6.8)   | 6 (2.0)   |       |
|   | D <sup>+</sup> | 67 (22.6) | 142 (48.0) |        | 140 (47.3) | 69 (23.3) |        | 168 (56.8) | 41 (13.9) |       |
| 4 |                |           |            | 0.023* |            |           | 0.007* |            |           | 0.149 |
|   | A              | 11 (3.7)  | 15 (5.1)   |        | 17 (5.7)   | 9 (3.0)   |        | 18 (6.1)   | 8 (2.7)   |       |
|   | B              | 18 (6.1)  | 36 (12.2)  |        | 33 (11.1)  | 21 (7.1)  |        | 44 (14.9)  | 10 (3.4)  |       |
|   | C              | 14 (4.7)  | 9 (3.0)    |        | 8 (2.7)    | 15 (5.1)  |        | 15 (5.1)   | 8 (2.7)   |       |
|   | D <sup>+</sup> | 58 (19.6) | 135 (45.6) |        | 136 (45.9) | 57 (19.3) |        | 158 (53.4) | 35 (11.8) |       |
| 5 |                |           |            | 0.214  |            |           | 0.893  |            |           | 0.578 |
|   | A              | 9 (3.0)   | 16 (5.4)   |        | 16 (5.4)   | 9 (3.0)   |        | 18 (6.1)   | 7 (2.4)   |       |
|   | B              | 13 (4.4)  | 12 (4.1)   |        | 15 (5.1)   | 10 (3.4)  |        | 22 (7.4)   | 3 (1.0)   |       |
|   | C              | 14 (4.7)  | 24 (8.1)   |        | 24 (8.1)   | 14 (4.7)  |        | 30 (10.1)  | 8 (2.7)   |       |
|   | D <sup>+</sup> | 65 (22.0) | 143 (48.3) |        | 139 (47.0) | 69 (23.3) |        | 165 (55.7) | 43 (14.5) |       |

|   |                |           |            |       |            |           |        |            |           |       |
|---|----------------|-----------|------------|-------|------------|-----------|--------|------------|-----------|-------|
| 6 |                |           |            | 0.289 |            |           | 0.002* |            |           | 0.052 |
|   | A              | 59 (19.9) | 110 (37.2) |       | 106 (35.8) | 63 (21.3) |        | 140 (47.3) | 30 (10.1) |       |
|   | B              | 13 (4.4)  | 34 (11.5)  |       | 41 (13.9)  | 6 (2.0)   |        | 39 (13.2)  | 8 (2.7)   |       |
|   | C              | 15 (5.1)  | 17 (5.7)   |       | 15 (5.1)   | 17 (5.7)  |        | 20 (6.8)   | 12 (4.1)  |       |
|   | D <sup>+</sup> | 14 (4.7)  | 34 (11.5)  |       | 32 (10.8)  | 16 (5.4)  |        | 36 (12.2)  | 12 (4.1)  |       |
| 7 |                |           |            | 0.268 |            |           | 0.802  |            |           | 0.340 |
|   | A              | 39 (13.2) | 87 (29.4)  |       | 79 (26.7)  | 47 (15.9) |        | 99 (33.4)  | 27 (9.1)  |       |
|   | B              | 33 (11.1) | 43 (14.5)  |       | 50 (16.9)  | 26 (8.8)  |        | 62 (20.9)  | 14 (4.7)  |       |
|   | C <sup>+</sup> | 15 (5.1)  | 34 (11.5)  |       | 34 (11.5)  | 15 (5.1)  |        | 42 (14.2)  | 7 (2.4)   |       |
|   | D              | 14 (4.7)  | 31 (10.5)  |       | 31 (10.5)  | 14 (4.7)  |        | 32 (10.8)  | 13 (4.4)  |       |
| 8 |                |           |            | 0.987 |            |           | 0.423  |            |           | 0.256 |
|   | A              | 30 (10.1) | 56 (18.9)  |       | 58 (19.6)  | 28 (9.5)  |        | 63 (21.3)  | 23 (7.8)  |       |
|   | B              | 44 (14.9) | 84 (28.4)  |       | 79 (26.7)  | 49 (16.6) |        | 108 (36.5) | 20 (6.8)  |       |
|   | C <sup>+</sup> | 15 (5.1)  | 29 (9.8)   |       | 33 (11.1)  | 11 (3.7)  |        | 34 (11.5)  | 10 (3.4)  |       |
|   | D              | 12 (4.1)  | 26 (8.8)   |       | 24 (8.1)   | 14 (4.7)  |        | 30 (10.1)  | 8 (2.7)   |       |
| 9 |                |           |            | 0.231 |            |           | 0.008* |            |           | 0.662 |

|    |                |           |            |       |            |           |       |            |           |       |
|----|----------------|-----------|------------|-------|------------|-----------|-------|------------|-----------|-------|
|    | A              | 16 (5.4)  | 36 (12.2)  |       | 37 (12.5)  | 15 (5.1)  |       | 41 (13.9)  | 11 (3.7)  |       |
|    | B              | 26 (8.8)  | 31 (10.5)  |       | 28 (9.5)   | 29 (9.8)  |       | 42 (14.2)  | 15 (5.1)  |       |
|    | C <sup>+</sup> | 44 (14.9) | 92 (31.1)  |       | 99 (33.4)  | 37 (12.5) |       | 111 (37.5) | 25 (8.4)  |       |
|    | D              | 15 (5.1)  | 36 (12.2)  |       | 30 (10.1)  | 21 (7.1)  |       | 41 (13.9)  | 10 (3.4)  |       |
| 10 |                |           |            | 0.330 |            |           | 0.262 |            |           | 0.622 |
|    | A <sup>+</sup> | 28 (9.5)  | 54 (18.2)  |       | 51 (17.2)  | 31 (10.5) |       | 68 (23.0)  | 14 (4.7)  |       |
|    | B              | 25 (8.4)  | 46 (15.5)  |       | 46 (15.5)  | 25 (8.4)  |       | 58 (19.6)  | 13 (4.4)  |       |
|    | C              | 27 (9.1)  | 38 (12.8)  |       | 39 (13.2)  | 26 (8.8)  |       | 50 (16.9)  | 15 (5.1)  |       |
|    | D              | 21 (7.1)  | 57 (19.3)  |       | 58 (19.9)  | 20 (6.8)  |       | 59 (19.9)  | 19 (6.4)  |       |
| 11 |                |           |            | 0.257 |            |           | 0.189 |            |           | 0.315 |
|    | A              | 22 (7.4)  | 41 (13.9)  |       | 39 (13.2)  | 24 (8.1)  |       | 46 (15.5)  | 17 (5.7)  |       |
|    | B <sup>+</sup> | 46 (15.5) | 104 (35.1) |       | 105 (35.5) | 45 (15.2) |       | 118 (39.9) | 32 (10.8) |       |
|    | C              | 14 (4.7)  | 29 (9.8)   |       | 29 (9.8)   | 14 (4.7)  |       | 37 (12.5)  | 6 (2.0)   |       |
|    | D              | 19 (6.4)  | 21 (7.1)   |       | 21 (7.1)   | 19 (6.4)  |       | 34 (11.5)  | 6 (2.0)   |       |
| 12 |                |           |            | 0.840 |            |           | 0.390 |            |           | 0.833 |
|    | A              | 29 (9.8)  | 57 (19.3)  |       | 56 (18.9)  | 30 (10.1) |       | 70 (23.6)  | 16 (5.4)  |       |

|    |                |           |            |       |            |           |       |            |           |       |
|----|----------------|-----------|------------|-------|------------|-----------|-------|------------|-----------|-------|
|    | B <sup>+</sup> | 41 (13.9) | 70 (23.6)  |       | 67(22.6)   | 44 (14.9) |       | 85 (28.7)  | 26 (8.8)  |       |
|    | C              | 14 (4.7)  | 33 (11.1)  |       | 34 (11.5)  | 13 (4.4)  |       | 38 (12.8)  | 9 (3.0)   |       |
|    | D              | 17 (5.7)  | 35 (11.8)  |       | 37 (12.5)  | 15 (5.1)  |       | 42 (14.2)  | 10 (3.4)  |       |
| 13 |                |           |            | 0.380 |            |           | 0.134 |            |           | 0.732 |
|    | A              | 29 (9.8)  | 45 (15.2)  |       | 51 (17.2)  | 23 (7.8)  |       | 61 (20.6)  | 13 (4.4)  |       |
|    | B <sup>+</sup> | 55 (18.6) | 110 (37.2) |       | 113 (38.2) | 52 (17.6) |       | 131 (44.3) | 34 (11.5) |       |
|    | C              | 13 (4.4)  | 23 (7.8)   |       | 20 (6.8)   | 16 (5.4)  |       | 28 (9.5)   | 8 (2.7)   |       |
|    | D              | 4 (1.4)   | 17 (5.7)   |       | 10 (3.4)   | 11 (3.7)  |       | 15 (5.1)   | 6 (2.0)   |       |
| 14 |                |           |            | 0.403 |            |           | 0.738 |            |           | 0.873 |
|    | A              | 19 (6.4)  | 53 (17.9)  |       | 45 (15.2)  | 27 (9.1)  |       | 58 (19.6)  | 14 (4.7)  |       |
|    | B <sup>+</sup> | 51 (17.2) | 84 (28.4)  |       | 92 (31.1)  | 43 (14.5) |       | 109 (36.8) | 26 (8.8)  |       |
|    | C              | 17 (5.7)  | 29 (9.8)   |       | 31 (10.5)  | 15 (5.1)  |       | 35 (11.8)  | 11 (3.7)  |       |
|    | D              | 14 (4.7)  | 29 (9.8)   |       | 26 (8.8)   | 17 (5.7)  |       | 33 (11.1)  | 10 (3.4)  |       |
| 15 |                |           |            | 0.882 |            |           | 0.915 |            |           | 0.253 |
|    | A              | 18 (6.1)  | 32 (10.8)  |       | 33 (11.1)  | 17 (5.7)  |       | 39 (13.2)  | 11 (3.7)  |       |
|    | B              | 8 (2.7)   | 21 (7.1)   |       | 18 (6.1)   | 11 (3.7)  |       | 27 (9.1)   | 2 (0.7)   |       |

|  |                |           |            |  |            |           |  |            |           |  |
|--|----------------|-----------|------------|--|------------|-----------|--|------------|-----------|--|
|  | C              | 6 (2.0)   | 12 (4.1)   |  | 13 (4.4)   | 5 (1.7)   |  | 13 (4.4)   | 5 (1.7)   |  |
|  | D <sup>+</sup> | 69 (23.3) | 130 (43.9) |  | 130 (43.9) | 69 (22.3) |  | 156 (52.7) | 43 (14.5) |  |

ADR, Adverse drug reaction; KQ, Knowledge Question; %, percent; + Correct knowledge response; \**P* value < 0.05; cc, A, choice A; B, choice B; C, choice C; D, choice D

KQ 1. What do you understand by the term adverse drug reactions (ADRs)?

- A. A noxious and unintended response to a drug at doses normally used in man. +
- B. A noxious and unintended response to a drug at abnormal doses used in man.
- C. A noxious and intended response to a drug at doses normally used in man.
- D. A noxious and intended response to a drug at abnormal doses used in man.

KQ 2. What is Pharmacovigilance?

- A. The science of detecting the type and incidence of ADR after a drug is marketed.
- B. The science of monitoring ADR's occurring in a Hospital.
- C. The process of improving the safety of the drug.
- D. The detection, assessment, understanding, and prevention of adverse effects. +

KQ 3. What is the consequence of serious ADR?

- A. Death.
- C. Increased health care cost

B. Hospital admission. D. All of the above. +

KQ 4. Who can report an ADR in Ethiopia?

A. Doctors. B. Pharmacists C. Nurses. D. All of the above. +

KQ 5. Which types of ADRs should be documented?

A. Suspected ADRs for a new drug. C. Suspected ADRs for a vaccine.  
B. Suspected ADRs for an old drug. D. All of the above. +

KQ 6. The international center of adverse drug reactions is located in...

A. The United States of America. B. France. C. Australia. D. Sweden. +

KQ 7. Which one of the following is the “WHO online databases” for reporting ADRs?

A. ADR advisory committee. B. Medsafe. C. Vigibase. + D. Med watch.

KQ 8. Which type of ADR reporting system do we have in Ethiopia?

A. Yellow card. C. Spontaneous reporting system. +  
B. Case reports. D. Meta-Analysis.

KQ 9. Which organization should the case of ADRs be reported to in Ethiopia?

A. Ministry of Health (MOH).  
B. Ethiopian Pharmacist Association (EPA).  
C. Food Medicine and Health Care Administration and Control Authority of Ethiopia (FMHACA). +

D. Pharmaceutical Fund and Supply Agency (PFSA).

KQ 10. Which one is the most important purpose of pharmacovigilance?

- A. To identify safe drugs. +                      C. Detect the incidence of side effects.  
B. Detect the incidence of ADRs. D. To identify predisposing factors to ADRs.

KQ 11. Do you think all ADRs are known before a drug is marketed?

- A. Yes.      B. No. +      C. May be.      D. Don't know.

KQ 12. Do you think ADRs caused by herbal medicines are neither documented nor reported?

- A. Yes.      B. No. +      C. May be.      D. Don't know.

KQ 13. Do you think ADRs are the same as adverse drug events (ADEs)?

- A. Yes.      B. No. +      C. May be.      D. Don't know.

KQ 14. Do you think there are no guidelines for reporting ADRs in Ethiopia?

- A. Yes.      B. No. +      C. May be.      D. Don't know.

KQ 15. Which type of medication is a candidate for ADR reporting?

- A. ADRs to traditional medicines.                      C. ADRs to vaccines.  
B. ADRs to medicated cosmetics.                      D. ADRs to all drugs. +

**Note: + Correct knowledge response**



Supplementary table 1B. Comparison of the knowledge of medical, pharmacy, and nurse students for each knowledge question based on their discipline and hearing of the term PV at the University of Gondar College of Medicine and Health sciences

| KQ | Choice | The frequency (%) of students hearing the term PV |           | P-value | The frequency (%) of students by discipline |            |           | P-value |
|----|--------|---------------------------------------------------|-----------|---------|---------------------------------------------|------------|-----------|---------|
|    |        | Yes                                               | No        |         | Pharmacy                                    | Medicine   | Nurse     |         |
| 1  |        |                                                   |           | 0.206   |                                             |            |           | 0.000** |
|    | A+     | 57 (19.3)                                         | 93 (31.4) |         | 60 (20.3)                                   | 80 (27.00) | 10 (3.4)  |         |
|    | B      | 22 (7.4)                                          | 55 (18.6) |         | 19 (6.4)                                    | 27 (9.1)   | 31 (10.5) |         |
|    | C      | 14 (4.7)                                          | 42 (14.2) |         | 6 (2.0)                                     | 31 (10.5)  | 19 (6.4)  |         |
|    | D      | 3 (1.0)                                           | 10 (3.4)  |         | 1 (0.3)                                     | 5 (1.7)    | 7 (2.4)   |         |
| 2  |        |                                                   |           | 0.555   |                                             |            |           | 0.022*  |
|    | A      | 25 (8.4)                                          | 67 (22.6) |         | 23 (7.8)                                    | 49 (16.6)  | 20 (6.8)  |         |
|    | B      | 18 (6.1)                                          | 37 (12.5) |         | 10 (3.4)                                    | 28 (9.5)   | 17 (5.7)  |         |
|    | C      | 14 (4.7)                                          | 29 (9.8)  |         | 9 (3.0)                                     | 22 (7.4)   | 12 (4.1)  |         |
|    | D+     | 39 (13.2)                                         | 67 (22.6) |         | 44 (14.9)                                   | 44 (14.9)  | 18 (6.1)  |         |

|   |    |           |            |        |           |            |           |        |
|---|----|-----------|------------|--------|-----------|------------|-----------|--------|
| 3 |    |           |            | 0.119  |           |            |           | 0.016* |
|   | A  | 10 (3.4)  | 25 (8.4)   |        | 8 (2.7)   | 21 (7.1)   | 6 (2.0)   |        |
|   | B  | 5 (1.7)   | 21 (7.1)   |        | 3 (1.0)   | 16 (5.4)   | 7 (2.4)   |        |
|   | C  | 5 (1.7)   | 21 (7.1)   |        | 2 (0.7)   | 15 (5.1)   | 9 (5.9)   |        |
|   | D+ | 76 (25.7) | 133 (44.9) |        | 73 (24.7) | 91 (30.7)  | 45 (15.2) |        |
| 4 |    |           |            | 0.012* |           |            |           | 0.021* |
|   | A  | 4 (1.4)   | 22 (7.4)   |        | 2 (0.7)   | 14 (4.7)   | 10 (3.4)  |        |
|   | B  | 15 (5.1)  | 39 (13.2)  |        | 13 (4.4)  | 30 (10.1)  | 11 (3.7)  |        |
|   | C  | 3 (1.0)   | 20 (6.8)   |        | 3 (1.0)   | 13 (4.4)   | 7 (2.4)   |        |
|   | D+ | 74 (25.0) | 119 (40.2) |        | 68 (23.0) | 86 (29.1)  | 39 (13.2) |        |
| 5 |    |           |            | 0.130  |           |            |           | 0.001* |
|   | A  | 4 (1.4)   | 21 (7.1)   |        | 2 (0.7)   | 13 (4.4)   | 10 (3.4)  |        |
|   | B  | 6 (2.0)   | 19 (6.4)   |        | 2 (0.7)   | 12 (4.1)   | 11 (3.7)  |        |
|   | C  | 16 (5.4)  | 22 (7.4)   |        | 17 (5.7)  | 14 (4.7)   | 7 (2.4)   |        |
|   | D+ | 70 (23.6) | 138 (46.6) |        | 65 (22.0) | 104 (35.1) | 39 (13.2) |        |
| 6 |    |           |            | 0.387  |           |            |           | 0.694  |

|   |                |           |            |        |           |           |           |         |
|---|----------------|-----------|------------|--------|-----------|-----------|-----------|---------|
|   | A              | 59 (19.9) | 110 (37.2) |        | 50 (16.9) | 78 (26.4) | 41 (13.9) |         |
|   | B              | 17 (5.7)  | 30 (10.1)  |        | 10 (3.4)  | 25 (8.4)  | 12 (4.1)  |         |
|   | C              | 7 (2.4)   | 25 (8.4)   |        | 9 (3.0)   | 16 (5.4)  | 7(2.4)    |         |
|   | D <sup>+</sup> | 13 (4.4)  | 35 (11.8)  |        | 17 (5.7)  | 24 (8.1)  | 7 (2.4)   |         |
| 7 |                |           |            | 0.034* |           |           |           | 0.259   |
|   | A              | 44 (14.9) | 82 (27.7)  |        | 37 (12.5) | 61 (20.6) | 28 (9.5)  |         |
|   | B              | 24 (8.1)  | 52 (17.6)  |        | 18 (6.1)  | 35 (11.8) | 23 (7.8)  |         |
|   | C <sup>+</sup> | 21 (7.1)  | 28 (9.5)   |        | 20 (6.8)  | 22 (7.4)  | 7 (2.4)   |         |
|   | D              | 7 (2.4)   | 38 (12.8)  |        | 11 (3.7)  | 25 (8.4)  | 9 (3)     |         |
| 8 |                |           |            | 0.905  |           |           |           | 0.090   |
|   | A              | 26 (8.8)  | 60 (20.3)  |        | 23 (7.8)  | 38 (12.8) | 25 (8.4)  |         |
|   | B              | 41 (13.9) | 87 (29.4)  |        | 30 (10.1) | 72 (24.3) | 26 (8.8)  |         |
|   | C <sup>+</sup> | 16 (5.4)  | 28 (9.5)   |        | 17 (5.7)  | 17 (5.7)  | 10 (3.4)  |         |
|   | D              | 13 (4.4)  | 25 (8.4)   |        | 16 (5.4)  | 16 (5.4)  | 6 (2.0)   |         |
| 9 |                |           |            | 0.049* |           |           |           | 0.000** |
|   | A              | 14 (4.7)  | 38 (12.8)  |        | 11 (3.7)  | 29 (9.8)  | 12 (4.1)  |         |

|    |                |           |           |       |           |           |          |        |
|----|----------------|-----------|-----------|-------|-----------|-----------|----------|--------|
|    | B              | 11 (3.7)  | 46 (15.5) |       | 8 (2.7)   | 27 (9.1)  | 22 (7.4) |        |
|    | C <sup>+</sup> | 52 (17.6) | 84 (28.4) |       | 45 (15.2) | 71 (24.0) | 20 (6.8) |        |
|    | D              | 19 (6.4)  | 32 (10.8) |       | 22 (7.4)  | 16 (5.4)  | 13 (4.4) |        |
| 10 |                |           |           | 0.199 |           |           |          | 0.019* |
|    | A <sup>+</sup> | 30 (10.1) | 52 (17.6) |       | 28 (9.5)  | 35 (11.8) | 19 (6.4) |        |
|    | B              | 24 (8.1)  | 47 (15.9) |       | 22 (7.4)  | 31 (10.5) | 18 (6.1) |        |
|    | C              | 14 (4.7)  | 51 (17.2) |       | 14 (4.7)  | 29 (9.8)  | 22 (7.4) |        |
|    | D              | 28 (9.5)  | 50 (16.9) |       | 22 (7.4)  | 48 (16.2) | 8 (2.7)  |        |
| 11 |                |           |           | 0.655 |           |           |          | 0.147  |
|    | A              | 20 (6.8)  | 43 (14.5) |       | 15 (5.1)  | 31 (10.5) | 17 (5.7) |        |
|    | B <sup>+</sup> | 53 (17.9) | 97 (32.8) |       | 50 (16.9) | 74 (25.0) | 26 (8.8) |        |
|    | C              | 11 (3.7)  | 32 (10.8) |       | 9 (3.0)   | 18 (6.1)  | 16 (5.4) |        |
|    | D              | 12 (4.1)  | 28 (9.5)  |       | 12 (4.1)  | 20 (6.8)  | 8 (2.7)  |        |
| 12 |                |           |           | 0.307 |           |           |          | 0.135  |
|    | A              | 32 (10.8) | 54 (18.2) |       | 32 (10.8) | 40 (13.5) | 14 (4.7) |        |
|    | B <sup>+</sup> | 37 (12.5) | 74 (25.0) |       | 35 (11.8) | 50 (16.9) | 26 (8.8) |        |

|    |    |           |            |       |           |           |           |        |
|----|----|-----------|------------|-------|-----------|-----------|-----------|--------|
|    | C  | 10 (3.4)  | 37 (12.5)  |       | 9 (3.0)   | 27 (9.1)  | 11 (3.7)  |        |
|    | D  | 17 (5.7)  | 35 (11.8)  |       | 10 (3.4)  | 26 (8.8)  | 16 (5.4)  |        |
| 13 |    |           |            | 0.343 |           |           |           | 0.042* |
|    | A  | 22 (7.4)  | 52 (17.6)  |       | 19 (6.4)  | 29 (9.8)  | 26 (8.8)  |        |
|    | B+ | 53 (17.9) | 112 (37.8) |       | 53 (17.9) | 81 (27.4) | 31 (10.5) |        |
|    | C  | 16 (5.4)  | 20 (6.8)   |       | 11 (3.7)  | 18 (6.1)  | 7 (2.4)   |        |
|    | D  | 5 (1.7)   | 16 (5.4)   |       | 3 (1.0)   | 15 (5.1)  | 3 (1.0)   |        |
| 14 |    |           |            | 0.828 |           |           |           | 0.528  |
|    | A  | 25 (8.4)  | 47 (15.9)  |       | 22 (7.4)  | 36 (12.2) | 14 (4.7)  |        |
|    | B+ | 40 (13.5) | 95 (32.1)  |       | 36 (12.2) | 71 (24.0) | 28 (9.5)  |        |
|    | C  | 16 (5.4)  | 30 (10.1)  |       | 16 (5.4)  | 16 (5.4)  | 14 (4.7)  |        |
|    | D  | 15 (5.1)  | 28 (9.5)   |       | 12 (4.1)  | 20 (6.8)  | 11 (3.7)  |        |
| 15 |    |           |            | 0.510 |           |           |           | 0.001* |
|    | A  | 12 (4.1)  | 38 (12.8)  |       | 6 (2.0)   | 23 (7.8)  | 21 (7.1)  |        |
|    | B  | 10 (3.4)  | 19 (6.4)   |       | 7 (2.4)   | 16 (5.4)  | 6 (2.0)   |        |
|    | C  | 5 (1.7)   | 13 (4.4)   |       | 6 (2.0)   | 5 (1.7)   | 7 (2.4)   |        |

|  |                |           |            |  |           |           |           |  |
|--|----------------|-----------|------------|--|-----------|-----------|-----------|--|
|  | D <sup>+</sup> | 69 (23.3) | 130 (43.9) |  | 67 (22.6) | 99 (33.4) | 33 (11.1) |  |
|--|----------------|-----------|------------|--|-----------|-----------|-----------|--|

KQ, Knowledge Question; PV, Pharmacovigilance; + Correct knowledge response; \**P*-value < 0.05; \*\**P*-value < 0.001; %, percent; A, choice A; B, choice B; C, choice C; D, choice D

KQ 1. What do you understand by the term adverse drug reactions (ADRs)?

- E. A noxious and unintended response to a drug at doses normally used in man. +
- F. A noxious and unintended response to a drug at abnormal doses used in man.
- G. A noxious and intended response to a drug at doses normally used in man.
- H. A noxious and intended response to a drug at abnormal doses used in man.

KQ 2. What is Pharmacovigilance?

- E. The science of detecting the type and incidence of ADR after a drug is marketed.
- F. The science of monitoring ADR's occurring in a Hospital.
- G. The process of improving the safety of the drug.
- H. The detection, assessment, understanding, and prevention of adverse effects. +

KQ 3. What is the consequence of serious ADR?

- C. Death.                                      C. Increased health care cost
- D. Hospital admission.                      D. All of the above. +

KQ 4. Who can report an ADR in Ethiopia?

B. Doctors. B. Pharmacists C. Nurses. D. All of the above. +

KQ 5. Which types of ADRs should be documented?

C. Suspected ADRs for a new drug. C. Suspected ADRs for a vaccine.

D. Suspected ADRs for an old drug. D. All of the above. +

KQ 6. The international center of adverse drug reactions is located in...

B. The United States of America. B. France. C. Australia. D. Sweden. +

KQ 7. Which one of the following is the “WHO online databases” for reporting ADRs?

B. ADR advisory committee. B. Medsafe. C. Vigibase. + D. Med watch.

KQ 8. Which type of ADR reporting system do we have in Ethiopia?

C. Yellow card. C. Spontaneous reporting system. +

D. Case reports. D. Meta-Analysis.

KQ 9. Which organization should the case of ADRs be reported to in Ethiopia?

E. Ministry of Health (MOH).

F. Ethiopian Pharmacist Association (EPA).

G. Food Medicine and Health Care Administration and Control Authority of Ethiopia (FMHACA). +

H. Pharmaceutical Fund and Supply Agency (PFSA).

KQ 10. Which one is the most important purpose of pharmacovigilance?

C. To identify safe drugs. +                      C. Detect the incidence of side effects.

D. Detect the incidence of ADRs. D. To identify predisposing factors to ADRs.

KQ 11. Do you think all ADRs are known before a drug is marketed?

B. Yes.      B. No. +      C. May be.      D. Don't know.

KQ 12. Do you think ADRs caused by herbal medicines are neither documented nor reported?

B. Yes.      B. No. +      C. May be.      D. Don't know.

KQ 13. Do you think ADRs are the same as adverse drug events (ADEs)?

B. Yes.      B. No. +      C. May be.      D. Don't know.

KQ 14. Do you think there are no guidelines for reporting ADRs in Ethiopia?

B. Yes.      B. No. +      C. May be.      D. Don't know.

KQ 15. Which type of medication is a candidate for ADR reporting?

C. ADRs to traditional medicines.              C. ADRs to vaccines.

D. ADRs to medicated cosmetics.                      D. ADRs to all drugs. +

**Note: + Correct knowledge response**

Supplementary table 2A. Comparison of the attitude of medical, pharmacy, and nurse students for each attitude statement based on their age, gender, and hearing of the term ADR at the University of Gondar College of Medicine and Health sciences



| AS | Choice | The frequency (%) of students by age |           | P-value | The frequency (%) of students by gender |           | P-value | The frequency (%) of students hearing of the term ADR |           | P-value |
|----|--------|--------------------------------------|-----------|---------|-----------------------------------------|-----------|---------|-------------------------------------------------------|-----------|---------|
|    |        | < 23                                 | ≥ 23      |         | Male                                    | Female    |         | Yes                                                   | No        |         |
| 1  |        |                                      |           | 0.576   |                                         |           | 0.780   |                                                       |           | 0.492   |
|    | SA     | 47 (15.9)                            | 98 (33.1) |         | 94 (31.8)                               | 51 (17.2) |         | 114 (38.5)                                            | 31 (10.5) |         |
|    | A      | 28 (9.5)                             | 58 (19.6) |         | 57 (19.3)                               | 29 (9.8)  |         | 70 (23.6)                                             | 16 (5.4)  |         |
|    | N      | 13 (4.4)                             | 22 (7.4)  |         | 22 (7.4)                                | 13 (4.4)  |         | 25 (8.4)                                              | 10 (3.4)  |         |
|    | D      | 8 (2.7)                              | 7 (2.4)   |         | 9 (3.0)                                 | 6 (2.0)   |         | 12 (4.1)                                              | 3 (1.0)   |         |
|    | SD     | 5 (1.7)                              | 10 (3.4)  |         | 12 (4.1)                                | 3 (1.0)   |         | 14 (4.7)                                              | 1 (0.3)   |         |
| 2  |        |                                      |           | 0.760   |                                         |           | 0.174   |                                                       |           | 0.939   |
|    | SA     | 2 (0.7)                              | 8 (2.7)   |         | 8 (2.7)                                 | 2 (0.7)   |         | 8 (2.7)                                               | 2 (0.7)   |         |
|    | A      | 16 (5.4)                             | 24 (8.1)  |         | 26 (8.8)                                | 14 (4.7)  |         | 33 (11.1)                                             | 7 (2.4)   |         |
|    | N      | 15 (5.1)                             | 34 (11.5) |         | 30 (10.1)                               | 19 (6.4)  |         | 38 (12.8)                                             | 11 (3.7)  |         |
|    | D      | 31 (10.5)                            | 56 (18.9) |         | 50 (16.9)                               | 37 (12.5) |         | 67 (22.6)                                             | 20 (6.8)  |         |

|   |    |           |           |       |           |           |       |           |              |       |
|---|----|-----------|-----------|-------|-----------|-----------|-------|-----------|--------------|-------|
|   | SD | 37 (12.5) | 73 (24.7) |       | 80 (27.0) | 30 (10.1) |       | 89 (30.1) | 21 (7.1)     |       |
| 3 |    |           |           | 0.315 |           |           | 0.575 |           |              | 0.448 |
|   | SA | 30 (10.1) | 67 (22.6) |       | 61 (20.6) | 36 (12.2) |       | 71 (24.0) | 26 (8.8)     |       |
|   | A  | 32 (10.8) | 56 (18.9) |       | 56 (18.9) | 32 (10.8) |       | 74 (25.0) | 14 (4.7)     |       |
|   | N  | 10 (3.4)  | 28 (9.5)  |       | 27 (9.1)  | 11 (3.7)  |       | 31 (10.5) | 7 (2.4)      |       |
|   | D  | 13 (4.4)  | 27 (9.1)  |       | 30 (10.1) | 10 (3.4)  |       | 32 (10.8) | 8 (2.7)      |       |
|   | SD | 16 (5.4)  | 17 (5.7)  |       | 20 (6.8)  | 13 (4.4)  |       | 27 (9.1)  | 6 (2.0)      |       |
| 4 |    |           |           | 0.671 |           |           | 0.874 |           |              | 0.084 |
|   | SA | 19 (6.4)  | 30 (10.1) |       | 32 (10.8) | 17 (5.7)  |       | 33 (11.1) | 16 (5.4)     |       |
|   | A  | 31 (10.5) | 76 (25.7) |       | 74 (25.0) | 33 (11.1) |       | 85 (28.7) | 22 (7.4)     |       |
|   | N  | 20 (6.8)  | 31 (10.5) |       | 31 (10.5) | 20 (6.8)  |       | 44 (14.9) | 7 (2.4)      |       |
|   | D  | 20 (6.8)  | 38 (12.8) |       | 37 (12.5) | 21 (7.1)  |       | 45 (15.2) | 13 (4.4)     |       |
|   | SD | 11 (3.7)  | 20 (6.8)  |       | 20 (6.8)  | 11 (3.7)  |       | 28 (9.5)  | 3 (1.0)      |       |
| 5 |    |           |           | 0.933 |           |           | 0.717 |           |              | 0.289 |
|   | SA | 43 (14.5) | 83 (28.0) |       | 80 (27.0) | 46 (15.5) |       | 94 (31.8) | 32<br>(10.8) |       |

|   |    |           |           |       |           |           |       |           |          |       |
|---|----|-----------|-----------|-------|-----------|-----------|-------|-----------|----------|-------|
|   | A  | 34 (11.5) | 71 (24.0) |       | 68 (23.0) | 37 (12.5) |       | 86 (29.1) | 19 (6.4) |       |
|   | N  | 10 (3.4)  | 17 (5.7)  |       | 19 (6.4)  | 8 (2.7)   |       | 22 (7.4)  | 5 (1.7)  |       |
|   | D  | 8 (2.7)   | 11 (3.7)  |       | 15 (5.1)  | 4 (1.4)   |       | 18 (6.1)  | 1 (0.3)  |       |
|   | SD | 6 (2.0)   | 13 (4.4)  |       | 12 (4.1)  | 7 (2.4)   |       | 15 (5.1)  | 4 (1.4)  |       |
| 6 |    |           |           | 0.245 |           |           | 0.872 |           |          | 0.270 |
|   | SA | 35 (11.8) | 69 (23.3) |       | 68 (23.0) | 36 (12.2) |       | 77 (26.0) | 27 (9.1) |       |
|   | A  | 34 (11.5) | 73 (24.7) |       | 68 (23.0) | 40 (13.5) |       | 86 (29.1) | 22 (7.4) |       |
|   | N  | 10 (3.4)  | 26 (8.8)  |       | 26 (8.8)  | 10 (3.4)  |       | 31 (10.5) | 5 (1.7)  |       |
|   | D  | 11 (3.7)  | 20 (6.8)  |       | 20 (6.8)  | 11 (3.7)  |       | 28 (9.5)  | 3 (1.0)  |       |
|   | SD | 10 (3.4)  | 7 (2.4)   |       | 12 (4.1)  | 5 (1.7)   |       | 13 (4.4)  | 4 (1.4)  |       |
| 7 |    |           |           | 0.070 |           |           | 0.471 |           |          | 0.478 |
|   | SA | 18 (6.1)  | 19 (6.4)  |       | 22 (7.4)  | 15 (5.1)  |       | 27 (9.1)  | 10 (3.4) |       |
|   | A  | 19 (6.4)  | 28 (9.5)  |       | 30 (10.1) | 17 (5.7)  |       | 39 (13.2) | 8 (2.7)  |       |
|   | N  | 10 (3.4)  | 29 (9.8)  |       | 24 (8.1)  | 15 (5.1)  |       | 30 (10.1) | 9 (3.0)  |       |
|   | D  | 26 (8.8)  | 42 (14.2) |       | 42 (14.2) | 26 (8.8)  |       | 51 (17.2) | 17 (5.7) |       |
|   | SD | 28 (9.5)  | 77 (26.0) |       | 76 (25.7) | 29 (9.8)  |       | 88 (29.7) | 17 (5.7) |       |

|    |    |           |           |       |           |           |       |           |          |        |
|----|----|-----------|-----------|-------|-----------|-----------|-------|-----------|----------|--------|
| 8  |    |           |           | 0.880 |           |           | 0.592 |           |          | 0.482  |
|    | SA | 12 (4.1)  | 25 (8.4)  |       | 27 (9.1)  | 10 (3.4)  |       | 29 (9.8)  | 8 (2.7)  |        |
|    | A  | 22 (7.4)  | 42 (14.2) |       | 44 (14.9) | 20 (6.8)  |       | 56 (18.9) | 8 (2.7)  |        |
|    | N  | 20 (6.8)  | 40 (13.5) |       | 41 (13.9) | 19 (6.4)  |       | 47 (15.9) | 13 (4.4) |        |
|    | D  | 17 (5.7)  | 40 (13.5) |       | 35 (11.8) | 22 (7.4)  |       | 44 (14.9) | 13 (4.4) |        |
|    | SD | 30 (10.1) | 48 (16.2) |       | 47 (15.9) | 31 (10.5) |       | 59 (19.9) | 19 (6.4) |        |
| 9  |    |           |           | 0.121 |           |           | 0.063 |           |          | 0.019* |
|    | SA | 13 (4.4)  | 21 (7.1)  |       | 26 (8.8)  | 8 (2.7)   |       | 20 (6.8)  | 14 (4.7) |        |
|    | A  | 14 (4.7)  | 28 (9.5)  |       | 28 (9.5)  | 14 (4.7)  |       | 34 (11.5) | 8 (2.7)  |        |
|    | N  | 25 (8.4)  | 29 (9.8)  |       | 28 (9.5)  | 26 (8.8)  |       | 41 (13.9) | 13 (4.4) |        |
|    | D  | 29 (9.8)  | 55 (18.6) |       | 52 (17.6) | 32 (10.8) |       | 71 (24.0) | 13 (4.4) |        |
|    | SD | 20 (6.8)  | 62 (20.9) |       | 60 (20.3) | 22 (7.4)  |       | 69 (23.3) | 13 (4.4) |        |
| 10 |    |           |           | 0.163 |           |           | 0.154 |           |          | 0.276  |
|    | SA | 3 (1.0)   | 17 (5.7)  |       | 18 (6.1)  | 2 (0.7)   |       | 17 (5.7)  | 3 (1.0)  |        |
|    | A  | 21 (7.1)  | 26 (8.8)  |       | 32 (10.8) | 15 (5.1)  |       | 41 (13.9) | 6 (2.0)  |        |
|    | N  | 14 (4.7)  | 36 (12.2) |       | 31 (10.5) | 19 (6.4)  |       | 41 (13.9) | 9 (3.0)  |        |

|  |    |           |           |  |           |           |  |           |          |  |
|--|----|-----------|-----------|--|-----------|-----------|--|-----------|----------|--|
|  | D  | 36 (12.2) | 65 (22.0) |  | 66 (22.3) | 35 (11.8) |  | 80 (27.0) | 21 (7.1) |  |
|  | SD | 27 (9.1)  | 51 (17.2) |  | 47 (15.9) | 31 (10.5) |  | 56 (18.9) | 22 (7.4) |  |

SA, Strongly Agree; A, Agree; N, Neutral; D, Disagree; SD, Strongly Disagree; ADR, Adverse Drug Reaction; AS, Attitude Statement; \**P*-value < 0.05; %, percent

Supplementary table 2B. Comparison of the attitude of medical, pharmacy, and nurse students for each attitude statement based on hearing of the term PV and their discipline at the University of Gondar College of Medicine and Health sciences

| AS | Choice | The frequency (%) of students hearing the term PV |           | P-value | The frequency (%) of students by discipline |           |           | P-value |
|----|--------|---------------------------------------------------|-----------|---------|---------------------------------------------|-----------|-----------|---------|
|    |        | Yes                                               | No        |         | Pharmacy                                    | Medical   | Nurse     |         |
| 1  |        |                                                   |           | 0.108   |                                             |           |           | 0.127   |
|    | SA     | 53 (17.9)                                         | 92 (31.1) |         | 50 (16.9)                                   | 65 (22.0) | 30 (10.1) |         |
|    | A      | 30 (10.1)                                         | 56 (18.9) |         | 23 (7.8)                                    | 46 (15.5) | 17 (5.7)  |         |
|    | N      | 6 (2.0)                                           | 29 (9.8)  |         | 8 (2.7)                                     | 19 (6.4)  | 8 (2.7)   |         |
|    | D      | 2 (0.7)                                           | 13 (4.4)  |         | 2 (0.7)                                     | 5 (1.7)   | 8 (2.7)   |         |
|    | SD     | 5 (1.7)                                           | 10 (3.4)  |         | 3 (1.0)                                     | 8 (2.7)   | 4 (1.4)   |         |

|   |    |           |           |       |           |           |          |        |
|---|----|-----------|-----------|-------|-----------|-----------|----------|--------|
| 2 |    |           |           | 0.296 |           |           |          | 0.038* |
|   | SA | 3 (1.0)   | 7 (2.4)   |       | 2 (0.7)   | 7 (2.4)   | 1 (0.3)  |        |
|   | A  | 10 (3.4)  | 30 (10.1) |       | 11 (3.7)  | 14 (4.7)  | 15 (5.1) |        |
|   | N  | 15 (5.1)  | 34 (11.5) |       | 16 (5.4)  | 20 (6.8)  | 13 (4.4) |        |
|   | D  | 24 (8.1)  | 63 (21.3) |       | 18 (6.1)  | 53 (17.9) | 16 (5.4) |        |
|   | SD | 44 (14.9) | 66 (22.3) |       | 39 (13.2) | 49 (16.6) | 22 (7.4) |        |
| 3 |    |           |           | 0.476 |           |           |          | 0.050  |
|   | SA | 36 (12.2) | 61 (20.6) |       | 32 (10.8) | 51 (17.2) | 14 (4.7) |        |
|   | A  | 31 (10.5) | 57 (19.3) |       | 23 (7.8)  | 43 (14.5) | 22 (7.4) |        |
|   | N  | 11 (3.7)  | 27 (9.1)  |       | 7 (2.4)   | 24 (8.1)  | 7 (2.4)  |        |
|   | D  | 10 (3.4)  | 30 (10.1) |       | 15 (5.1)  | 13 (4.4)  | 12 (4.1) |        |
|   | SD | 8 (2.7)   | 25 (8.4)  |       | 9 (3.0)   | 12 (4.1)  | 12 (4.1) |        |
| 4 |    |           |           | 0.198 |           |           |          | 0.165  |
|   | SA | 14 (4.7)  | 35 (11.8) |       | 10 (3.4)  | 26 (8.8)  | 13 (4.4) |        |
|   | A  | 44 (14.9) | 63 (21.3) |       | 40 (13.5) | 46 (15.5) | 21 (7.1) |        |
|   | N  | 13 (4.4)  | 38 (12.8) |       | 10 (3.4)  | 32 (10.8) | 9 (3.0)  |        |

|   |    |           |           |       |           |           |          |        |
|---|----|-----------|-----------|-------|-----------|-----------|----------|--------|
|   | D  | 17 (5.7)  | 41 (13.9) |       | 17 (5.7)  | 27 (9.1)  | 14 (4.7) |        |
|   | SD | 8 (2.7)   | 23 (7.8)  |       | 9 (3.0)   | 12 (4.1)  | 10 (3.4) |        |
| 5 |    |           |           | 0.301 |           |           |          | 0.294  |
|   | SA | 44 (14.9) | 82 (27.7) |       | 38 (12.8) | 59 (19.9) | 29 (9.8) |        |
|   | A  | 38 (12.8) | 67 (22.6) |       | 34 (11.5) | 54 (18.2) | 17 (5.7) |        |
|   | N  | 5 (1.7)   | 22 (7.4)  |       | 6 (2.0)   | 10 (3.4)  | 11 (3.7) |        |
|   | D  | 5 (1.7)   | 14 (4.7)  |       | 4 (1.4)   | 9 (3.0)   | 6 (2.0)  |        |
|   | SD | 4 (1.4)   | 15 (5.1)  |       | 4 (1.4)   | 11 (3.7)  | 4 (1.4)  |        |
| 6 |    |           |           | 0.111 |           |           |          | 0.228  |
|   | SA | 35 (11.8) | 69 (23.3) |       | 30 (10.1) | 46 (15.5) | 28 (9.5) |        |
|   | A  | 43 (14.5) | 65 (22.0) |       | 40 (13.5) | 51 (17.2) | 17 (5.7) |        |
|   | N  | 7 (2.4)   | 29 (9.8)  |       | 6 (2.0)   | 21 (7.1)  | 9 (3.0)  |        |
|   | D  | 7 (2.4)   | 24 (8.1)  |       | 6 (2.0)   | 17 (5.7)  | 8 (2.7)  |        |
|   | SD | 4 (1.4)   | 13 (4.4)  |       | 4 (1.4)   | 8 (2.7)   | 5 (1.7)  |        |
| 7 |    |           |           | 0.379 |           |           |          | 0.002* |
|   | SA | 14 (4.7)  | 23 (7.8)  |       | 7 (2.4)   | 12 (4.1)  | 18 (6.1) |        |

|   |    |           |           |       |           |           |          |        |
|---|----|-----------|-----------|-------|-----------|-----------|----------|--------|
|   | A  | 12 (3.7)  | 35 (11.8) |       | 11 (3.7)  | 21 (7.1)  | 15 (5.1) |        |
|   | N  | 12 (4.1)  | 27 (9.1)  |       | 12 (4.1)  | 20 (6.8)  | 7 (2.4)  |        |
|   | D  | 18 (6.1)  | 50 (16.9) |       | 21 (7.1)  | 32 (10.8) | 15 (5.1) |        |
|   | SD | 40 (13.5) | 65 (22.0) |       | 35 (11.8) | 58 (19.6) | 12 (4.1) |        |
| 8 |    |           |           | 0.195 |           |           |          | 0.262  |
|   | SA | 10 (3.4)  | 27 (9.1)  |       | 9 (3.0)   | 15 (5.1)  | 13 (4.4) |        |
|   | A  | 23 (7.8)  | 41 (13.9) |       | 22 (7.4)  | 25 (8.4)  | 17 (5.7) |        |
|   | N  | 18 (6.1)  | 42 (14.2) |       | 17 (5.7)  | 34 (11.5) | 9 (3.0)  |        |
|   | D  | 13 (4.4)  | 44 (14.9) |       | 13 (4.4)  | 30 (10.1) | 14 (4.7) |        |
|   | SD | 32 (10.8) | 46 (15.5) |       | 25 (8.4)  | 39 (13.2) | 14 (4.7) |        |
| 9 |    |           |           | 0.700 |           |           |          | 0.020* |
|   | SA | 10 (3.4)  | 24 (8.1)  |       | 9 (3.0)   | 12 (4.1)  | 13 (4.4) |        |
|   | A  | 15 (5.1)  | 27 (9.1)  |       | 17 (5.7)  | 13 (4.4)  | 12 (4.1) |        |
|   | N  | 16 (5.4)  | 38 (12.8) |       | 15 (5.1)  | 26 (8.8)  | 13 (4.4) |        |
|   | D  | 24 (8.1)  | 60 (20.3) |       | 22 (7.4)  | 42 (14.2) | 20 (6.8) |        |
|   | SD | 31 (10.5) | 51 (17.2) |       | 23 (7.8)  | 50 (16.9) | 9 (3.0)  |        |





|   |                                                                          |           |            |           |            |           |           |            |  |
|---|--------------------------------------------------------------------------|-----------|------------|-----------|------------|-----------|-----------|------------|--|
| 1 | Have you ever been trained on how to report ADRs?                        |           |            |           |            |           |           |            |  |
|   | Yes                                                                      | 15 (5.1)  | 12 (4.1)   | 5 (1.7)   | 29 (9.8)   | 3 (1.0)   | 16 (5.4)  | 16 (5.4)   |  |
|   | No                                                                       | 71 (24.0) | 131 (44.3) | 62 (20.9) | 206 (69.6) | 58 (19.6) | 80 (27.0) | 184 (62.2) |  |
|   | P-value                                                                  | 0.062     |            |           | 0.096      |           | 0.025*    |            |  |
| 2 | Have you encountered a patient with ADR during your clinical attachment? |           |            |           |            |           |           |            |  |
|   | Yes                                                                      | 39 (13.2) | 27 (9.1)   | 24 (8.1)  | 74 (25.0)  | 16 (5.4)  | 34 (11.5) | 56 (18.9)  |  |
|   | No                                                                       | 47 (15.9) | 116 (39.2) | 43 (14.5) | 161 (54.4) | 45 (15.2) | 62 (20.9) | 144 (48.6) |  |
|   | P-value                                                                  | 0.000**   |            |           | 0.426      |           | 0.194     |            |  |
| 3 | Have you ever reported any ADR?                                          |           |            |           |            |           |           |            |  |
|   | Yes                                                                      | 14 (4.7)  | 19 (6.4)   | 7 (2.4)   | 31 (10.5)  | 9 (3.0)   | 12 (4.1)  | 28 (9.5)   |  |
|   | No                                                                       | 72 (24.3) | 124 (41.9) | 60 (20.3) | 204 (68.9) | 52 (17.6) | 84 (28.4) | 172 (58.1) |  |
|   | P-value                                                                  | 0.575     |            |           | 0.750      |           | 0.724     |            |  |
| 4 | Have you ever counsel patients about possible ADRs of drugs?             |           |            |           |            |           |           |            |  |
|   | Yes                                                                      | 47 (15.9) | 23 (7.8)   | 11 (3.7)  | 68 (23.0)  | 13 (4.4)  | 43 (14.5) | 38 (12.8)  |  |
|   | No                                                                       | 39 (13.2) | 120 (40.5) | 56 (18.9) | 167 (56.4) | 48 (16.2) | 53 (17.9) | 162 (54.0) |  |

|   |                                            |           |            |           |            |           |           |            |  |
|---|--------------------------------------------|-----------|------------|-----------|------------|-----------|-----------|------------|--|
|   | P-value                                    |           | 0.000**    |           |            | 0.234     |           | 0.000**    |  |
| 5 | Have you ever seen the ADR reporting form? |           |            |           |            |           |           |            |  |
|   | Yes                                        | 9 (3.0)   | 25 (8.4)   | 26 (8.8)  | 46 (15.5)  | 14 (4.7)  | 16 (5.4)  | 44 (14.9)  |  |
|   | No                                         | 77 (26.0) | 118 (39.9) | 41 (13.9) | 189 (63.9) | 47 (15.9) | 80 (27.0) | 156 (52.7) |  |
|   | P-value                                    |           | 0.000**    |           |            | 0.559     |           | 0.285      |  |

Chi-square ( $\chi^2$ ) test; \*P value < 0.05; \*\*P value < 0.001; %, percent
